# Supplementary material for: The Effect of Group Composition and Mineral Supplementation during Rearing on Measures of Cartilage Condition and Bone Mineral Density in Replacement Gilts
Source: MDPI journal article supplement (doi:10.3390/ani9090637), 2019-08-30
Supplement: s1 [file s1]

**Table S1.** Rules applied for statistical purposes using SAS 9.4 where numbers of scores at the extreme ends of scoring scales were too small to statistically analyse.

| Disorder           | Rule                                                      |
|--------------------|-----------------------------------------------------------|
| HC thinnings       | Thinnings >5 = 5;                                         |
| HC invaginations   | Invagination >4 = 4;<br>Invagination <1 = 1;              |
| TN total           | Inner >3 = 3;                                             |
| Inner thinning     | Inner thinning >1 = 1;<br>Inner invagination >1 = 1;      |
| Inner invagination | Inner invagination <1 = 0;<br>Inner invagination = 1 = 1; |
| Overgrowths        | Overgrowth <1 then delete;                                |
